# Supplementary material for: Discovery of authigenic apatite pellets in rare-earth elements-rich deep-sea sediments
Source: Research Square preprint supplement (doi:10.21203/rs.3.rs-4478206/v1), 2024-09-26
Supplement: Supplementary file 1 [file 4c8a5afa4f8b10e4b584a393.xlsx]

## Sheet: Suppl. Dataset Table 1
Supplementary Dataset Table 1. Eelement contents of AA-CFA pellets and bioapatite fossils.
Sediment ID	Depth	Grain ID	Description	La	Ce	Pr	Nd	Sm	Eu	Gd	Tb	Dy	Y	Ho	Er	Tm	Yb	Lu	REY	Ce/Ce*	Eu/Eu*	MgO	SiO2	K2O	Cl	CaO	P2O5	Na2O	F	SO3	Total
				μg/g, measured by LA-ICP-MS																		wt.%, measured by EPMA
ESP-1	300 cm	ESP-1-30-01	AA-CFA pellets	2732.38	293.412	524.969	2347.37	502.505	130.167	670.173	97.1891	689.176	6110.62	157.378	464.622	64.8785	424.317	66.773	15275.9	0.0562842	1.02857	0.199	1.572	0.065	0.555	33.879	22.835	0.972	1.747	1	62.824
	300 cm	ESP-1-30-02	AA-CFA pellets	3298.83	192.796	606.813	2793.07	587.822	148.605	746.065	109.937	750.441	6982.92	171.72	512.41	67.2822	428.245	62.9546	17459.9	0.0312366	1.03451	0.353	0.612	0.035	0.201	40.973	25.643	0.915	2.233	1.237	72.202
	300 cm	ESP-1-30-03	AA-CFA pellets	3275.02	319.165	675.227	2971.22	631.113	166.578	792.612	117.274	783.543	6075.99	170.784	507.757	70.3044	432.367	65.1607	17054.1	0.0494393	1.08694	0.256	1.916	0.061	0.117	40.824	27.136	0.997	2.814	1.124	75.245
	300 cm	ESP-1-30-04	AA-CFA pellets	1639.32	106.52	311.031	1398.11	302.119	78.4877	403.157	59.426	435.828	3994.61	102.395	317.748	46.0376	314.56	50.203	9559.55	0.0342518	1.0312	0.372	0.423	0.068	0.127	45.285	27.523	0.958	2.571	1.21	78.537
	300 cm	ESP-1-30-05	AA-CFA pellets	1241.97	105.761	206.974	912.734	201.369	54.8408	282.173	45.0063	337.146	3418.71	82.6883	261.67	36.2136	258.804	41.3415	7487.4	0.0474923	1.04876	0.267	2.174	0.179	0.19	39.545	31.038	1.381	2.682	1.742	79.198
	300 cm	ESP-1-30-06	AA-CFA pellets	1457.63	130.504	285.784	1259.39	279.085	73.6617	395.416	57.4201	413.644	4018.15	98.1299	314.016	44.6116	299.185	47.5191	9174.15	0.0464955	1.00941	0.383	2.077	0.108	0.308	38.628	37.106	1.428	4.021	1.325	85.384
	300 cm	ESP-1-30-07	AA-CFA pellets	1482.38	114.343	252.083	1128.43	232.189	65.5982	338.142	50.4392	377.129	3806.87	92.5653	298.781	41.9993	285.918	45.9812	8612.85	0.0426543	1.06188	0.273	1.986	0.053	0.116	39.142	28.299	1.087	2.195	1.47	74.621
ESP-1	550 cm	ESP-1-55-01	AA-CFA pellets	3336.05	226.002	612.566	2717.08	557.104	148.936	762.512	113.558	782.26	7308.47	178.778	548.976	73.0036	469.054	74.1318	17908.5	0.0362366	1.04469	0.284	0.929	0.033	0.241	34.307	21.624	0.891	0.617	1.956	60.882
	550 cm	ESP-1-55-02	AA-CFA pellets	1787.19	146.388	352.128	1545.77	329.394	89.3149	462.823	69.4606	499.234	4912.09	121.432	389.265	57.0661	387.813	64.7976	11214.2	0.0424409	1.04241	0.387	0.728	0.06	0.256	35.642	25.074	0.957	1.337	1.763	66.204
	550 cm	ESP-1-55-03	AA-CFA pellets	1514.5	115.086	281.163	1310.55	280.475	74.5314	437.217	67.0195	477.488	4881.39	124.011	388.877	51.715	392.751	55.9196	10452.7	0.0404486	0.956094	0.151	1.067	0.03	0.204	36.891	26.749	0.972	1.636	1.176	68.876
ESP-2	170 cm	ESP-2-17-01	AA-CFA pellets	2698.29	96.235	498.116	2290.21	490.297	126.931	647.519	93.4655	645.543	5521.71	144.615	437.661	56.8253	355.606	53.9306	14157	0.0190319	1.03415	0.3	0.674	0.034	0.146	39.597	25.491	0.864	2.608	1.367	71.081
	170 cm	ESP-2-17-02	AA-CFA pellets	2570.31	146.957	438.836	2007.22	413.065	111.438	570.739	82.1234	596.628	5617.84	141.354	430.394	58.9962	375.091	58.9076	13619.9	0.0315633	1.04807	0.342	0.755	0.064	0.304	33.285	21.8	0.834	1.714	1.316	60.414
	170 cm	ESP-2-17-03	AA-CFA pellets	2814.17	130.709	477.006	2205.75	442.496	120.211	624.572	89.6806	652.794	6757.61	158.451	491.606	67.2308	429.139	66.8042	15528.2	0.0257195	1.04143	0.328	2.763	0.063	0.334	33.777	21.051	0.934	1.709	1.394	62.353
	170 cm	ESP-2-17-04	AA-CFA pellets	3071.13	100.3	529.694	2397.22	486.765	129.742	655.794	94.7107	675.642	6015.21	155.869	473.203	63.2644	391.626	60.5415	15300.7	0.0179516	1.05178	0.426	2.118	0.046	0.19	39.57	27.315	0.854	3.197	1.335	75.051
	170 cm	ESP-2-17-05	AA-CFA pellets	1463.24	91.6974	233.391	1061.84	214.057	60.92	334.191	49.7079	386.612	4352.14	97.6162	313.782	45.6017	313.072	49.582	9067.45	0.0355898	1.02295	0.296	0.559	0.06	0.314	29.502	23.209	0.951	1.712	1.209	57.812
	170 cm	ESP-2-17-06	AA-CFA pellets	1658.97	103.7	278.237	1284.06	274.794	79.9375	432.359	66.3342	518.168	5788.69	135.377	444.553	63.7345	442.271	70.201	11641.4	0.0347688	1.04033	0.271	0.383	0.034	0.149	38.672	27.779	1.035	2.056	0.915	71.294
	170 cm	ESP-2-17-07	AA-CFA pellets	1714.55	87.5398	276.978	1277.98	260.42	70.977	380.349	56.3311	415.6	4325.21	100.558	311.707	43.2592	284.914	44.4725	9650.84	0.0288453	1.02253	0.276	1.22	0.051	0.242	38.692	27.259	1.026	2.163	0.954	71.883
	170 cm	ESP-2-17-08	AA-CFA pellets	1421.14	79.3606	223.774	1044.94	207.022	56.3072	306.251	43.5815	328.794	3520.62	79.5487	242.799	33.5281	219.808	34.0331	7841.51	0.0318808	1.01215	0.516	1.547	0.08	0.236	31.422	26.626	0.976	1.99	1.641	65.034
	170 cm	ESP-2-17-09	AA-CFA pellets	1717.78	106.445	274.482	1216.78	248.918	71.0799	379.001	57.9911	430.446	5091.23	109.897	362.492	53.1683	350.927	56.4803	10527.1	0.035166	1.04318	0.324	2.786	0.042	0.215	36.299	28.65	0.897	3.31	1.533	74.056
ESP-2	320 cm	ESP-2-32-01	AA-CFA pellets	1726.88	107.64	277.562	1260.03	253.172	70.3744	365.539	55.4267	409.2	4171.3	100.201	315.456	43.5491	294.583	47.2032	9498.12	0.0352884	1.0505	0.383	1.84	0.054	0.201	35.809	25.734	0.794	2.837	2.738	70.39
	320 cm	ESP-2-32-02	AA-CFA pellets	1138.87	79.2093	179.975	782.881	157.858	43.394	231.597	34.1024	258.299	2697.79	64.1925	204.493	30.3388	198.758	32.5711	6134.33	0.0396486	1.02838	0.209	2.518	0.155	0.289	35.81	30.296	0.701	1.669	1.444	73.091
	320 cm	ESP-2-32-03	AA-CFA pellets	1268.15	98.9981	210.701	909.457	193.054	48.8179	253.294	36.5847	275.825	2795.58	68.158	208.849	28.6679	175.564	28.3365	6600.04	0.0435929	1.01418	0.173	3.168	0.177	0.202	39.633	28.951	1.299	3.079	2.144	78.826
	320 cm	ESP-2-32-04	AA-CFA pellets	1525.28	95.7319	267.654	1204.13	257.125	71.6511	375.79	56.8702	417.984	4122.64	102.6	329.96	46.7632	305.879	49.3936	9229.45	0.0342441	1.04502	0.26	2.296	0.132	0.247	37.381	29.161	1.134	3.067	1.59	75.268
	320 cm	ESP-2-32-05	AA-CFA pellets	1951.59	111.694	316.329	1419.51	287.367	80.6264	404.614	62.5734	471.703	5015.62	112.676	355.071	49.9076	332.303	51.6625	11023.2	0.0322897	1.07722	0.232	1.802	0.064	0.36	34.199	25.695	1.128	2.536	1.299	67.315
	320 cm	ESP-2-32-06	AA-CFA pellets	1319.87	90.8257	227.161	1025.13	217.963	60.5066	323.242	47.3268	358.022	3590.06	85.0108	271.647	38.5629	261.314	40.6149	7957.26	0.037859	1.0314	0.239	2.049	0.156	0.323	34.498	28.378	1.175	2.901	1.673	71.392
	320 cm	ESP-2-32-07	AA-CFA pellets	1020.06	89.6754	180.029	750.69	167.491	46.7815	234.842	37.3101	285.391	2980.82	69.7136	234.642	34.3678	241.809	37.0112	6410.63	0.0478463	1.07519	0.241	1.167	0.078	0.352	33.612	25.551	1.196	1.986	1.601	65.784
	320 cm	ESP-2-32-08	AA-CFA pellets	1253.03	94.2034	221.058	985.947	202.331	58.6982	304.252	46.2751	352.679	3580.66	88.482	280.7	41.6083	281.353	44.5764	7835.85	0.0409242	1.06835	0.253	0.882	0.04	0.204	36.668	29.679	1.058	3.335	1.546	73.665
	320 cm	ESP-2-32-09	AA-CFA pellets	1813.02	100.228	337.403	1473.93	295.908	83.5796	407.981	55.3624	415.572	4074.96	96.3682	283.159	37.4723	234.545	35.2233	9744.71	0.0293944	1.09875	0.227	3.101	0.177	0.439	38.656	28.61	1.318	2.603	1.648	76.779
	320 cm	ESP-2-32-10	AA-CFA pellets	1668.31	93.462	283.528	1304.99	269.357	73.1643	384.246	56.596	411.816	3927.21	96.4641	298.784	41.9423	265.899	40.9276	9216.69	0.0309872	1.03436	0.27	2.459	0.053	0.206	36.705	29.25	1.191	3.326	1.324	74.784
TKB-1	Surface sed.	TKB-1-01	AA-CFA pellets	2984.95	142.526	587.525	2633.45	548.56	141.091	717.507	101.91	710.607	6299.09	160.968	485.104	64.6102	427.886	67.1666	16072.9	0.024752	1.0335	0.449	-	0.07	0.142	45.901	33.189	0.999	1.193	0.934	82.877
	Surface sed.	TKB-1-02	AA-CFA pellets	4401.81	105.013	947.553	4147	858.744	223.876	1084.83	156.515	1039.89	7698.75	226.258	656.076	85.9191	527.37	76.9759	22236.6	0.0118563	1.06983	0.356	0.951	0.038	0.208	43.93	28.545	0.565	0.317	0.794	75.704
	Surface sed.	TKB-1-03	AA-CFA pellets	1723.31	148.205	418.182	1841.72	430.731	114.73	568.663	91.1293	661.56	5526.02	152.185	476.2	70.1877	491.223	77.1985	12791.2	0.0402689	1.06423	0.474	0.156	0.064	0.496	40.516	30.551	1.287	1.622	0.603	75.769
	Surface sed.	TKB-1-04	AA-CFA pellets	3240.78	91.4977	714.404	3061.96	634.932	172.812	827.9	117.053	817.901	6539.34	185.141	543.853	70.6596	448.491	65.4941	17532.2	0.0138705	1.09573	0.242	2.788	0.051	0.314	33.62	22.046	0.282	0.941	0.396	60.68
	Surface sed.	TKB-1-05	AA-CFA pellets	1970.3	85.5191	412.597	1834.89	381.866	108.182	524.268	75.2285	521.842	4688.34	119.318	359.673	47.1024	300.433	44.3672	11473.9	0.0218576	1.10495	0.119	0.489	0.037	0.241	39.918	29.141	0.101	1.023	1.415	72.484
	Surface sed.	TKB-1-06	AA-CFA pellets	1997.2	137.674	471.747	2128.97	476.131	125.774	608.156	90.3057	611.074	5199.33	139.433	418.606	58.7372	399.611	62.2844	12925	0.0327234	1.07684	0.238	0.547	0.067	0.313	41.448	28.28	0.903	1.293	0.567	73.656
	Surface sed.	TKB-1-07	AA-CFA pellets	3608.45	86.1674	821.208	3498.22	752.46	201.258	916.068	133.602	888.395	7041.19	195.617	563.204	72.5831	438.087	62.1829	19278.7	0.0115489	1.12205	0.339	0.194	0.02	0.269	40.66	22.89	0.758	0.685	0.756	66.571
TKB-3	Surface sed.	TKB-3-01	AA-CFA pellets	2449.35	158.891	454.661	1997.85	424.973	114.772	602.617	91.087	673.979	6547.87	162.012	507.803	71.2942	478.588	76.3682	14812.1	0.0345321	1.03231	0.355	1.615	0.079	0.316	42.791	26.198	0.909	1.132	0.613	74.008
	Surface sed.	TKB-3-02	AA-CFA pellets	4011	99.1353	798.903	3385.64	704.201	180.367	900.143	130.026	866.633	7068.04	195	568.93	75.5508	481.85	70.1858	19535.6	0.0127424	1.04364	0.34	1.321	0.118	0.155	41.32	32.093	0.797	1.439	0.666	78.249
	Surface sed.	TKB-3-03	AA-CFA pellets	4678.92	120.607	928.582	4015.71	831.926	214.756	1075.33	157.459	1053.31	8552.68	236.76	701.97	94.7141	610.676	92.4237	23365.8	0.0133115	1.04477	0.25	0.099	0.066	0.067	49.131	32.113	0.75	4.3	0.973	87.749
	Surface sed.	TKB-3-04	AA-CFA pellets	1843.2	118.583	324.265	1413.83	284.842	74.5248	389.694	57.0756	400.749	3838.37	92.7814	278.945	37.2833	237.328	35.6764	9427.15	0.0350631	1.02268	0.305	0.741	0.047	0.174	42.539	26.255	0.467	0.703	0.7	71.931
	Surface sed.	TKB-3-05	AA-CFA pellets	4227.53	117.492	876.537	3767.09	797.237	204.976	998.729	144.655	965.424	7300.02	214.159	633.23	85.0989	537.73	79.5536	20949.5	0.0140617	1.06039	0.467	0.993	0.076	0.121	42.593	29.418	1.281	1.987	0.82	77.756
	Surface sed.	TKB-3-06	AA-CFA pellets	3107.45	175.482	604.875	2530.57	513.188	145.598	690.799	100.529	697.212	6115.41	156.552	470.115	63.5035	403.314	60.9191	15835.5	0.0294236	1.12014	0.291	0.643	0.053	0.182	45.516	33.492	0.593	2.213	0.772	83.755
	Surface sed.	TKB-3-07	AA-CFA pellets	3710.14	168.575	676.796	2900	592.341	160.027	792.343	118.944	823.552	7324.32	192.093	576.28	76.5281	501.486	75.0945	18688.5	0.0243743	1.07077	0.313	1.447	0.1	0.388	38.559	18.752	0.516	0.257	0.586	60.918
	Surface sed.	TKB-3-08	AA-CFA pellets	2839.08	235.019	513.061	2210.98	456.423	123.908	616.654	94.0085	673.897	6107.8	158.894	504.565	69.3231	458.138	71.5047	15133.2	0.044591	1.0694	0.434	2.564	0.075	0.353	39.496	22.979	0.805	0.717	0.606	68.029
TKB-1	Surface sed.	TKB-1-01-F	Fossil tooth-tip	277.342	5.62043	64.5063	282.873	61.1078	15.9048	81.8879	12.8529	85.8276	763.307	19.9046	64.0311	8.4387	57.5313	9.05639	1810.19	0.00969522	1.03045	0.202	-	0.03	0.073	48.3	33.21	0.825	1.814	0.385	84.106
	Surface sed.	TKB-1-02-F	Fossil tooth-root	428.132	9.92493	98.3476	429.95	98.8818	27.7667	154.602	25.3788	191.686	1852.35	47.2746	155.787	23.5035	163.084	26.8111	3733.48	0.0111597	1.00837	0.319	-	0.066	0.186	45.449	38.221	1.049	2.208	0.656	87.346
	Surface sed.	TKB-1-03-F	Fossil tooth-tip	226.528	4.93623	48.3997	215.48	49.5738	13.4679	71.066	12.1102	90.9154	878.918	22.0433	72.5712	10.7335	74.2495	12.2316	1803.22	0.0108687	1.03135	0.194	-	0.025	0.073	47.402	34.411	0.94	4.359	0.282	85.936
	Surface sed.	TKB-1-04-F	Fossil tooth-root	1090.57	62.9742	261.016	1164.83	266.77	73.0318	373.592	60.3378	461.576	4135.08	109.409	344.254	50.9004	357.764	57.2735	8869.37	0.0272293	1.05465	0.34	-	0.026	0.11	41.767	32.226	0.698	2.641	0.761	77.73
	Surface sed.	TKB-1-05-F	Fossil tooth-tip	103.568	1.65148	21.6391	95.0561	19.4096	6.2069	28.2247	4.87575	33.462	318.304	7.79155	26.1968	3.67397	26.0786	4.53143	700.67	0.00803869	1.20308	0.134	-	0.011	0.075	49.164	35.641	0.716	1.242	0.182	86.734
	Surface sed.	TKB-1-06-F	Fossil tooth-root	196.191	8.22085	46.5219	205.104	45.5161	12.4821	64.0185	10.5925	76.2412	678.903	18.0101	53.9372	8.04663	58.3525	9.5439	1491.68	0.0198523	1.0536	0.272	-	0.013	0.107	45.659	34.396	0.712	2.728	0.733	83.576
TKB-3	Surface sed.	TKB-3-01-F	Fossil tooth-tip	110.799	3.12885	23.6249	105	25.683	6.53862	36.6858	5.91116	43.6807	401.388	10.3874	34.3944	5.14153	34.9674	5.98219	853.312	0.0140986	0.968679	0.157	-	0.043	0.129	50.427	34.107	0.798	1.103	0.207	86.487
	Surface sed.	TKB-3-02-F	Fossil tooth-root	209.42	11.4044	47.7541	218.086	47.1373	13.0109	70.78	11.3042	85.4051	795.165	21.0156	70.1581	10.1967	71.2717	11.5825	1693.69	0.0263115	1.01741	0.353	-	0.114	0.387	46.474	31.848	1.01	0.886	0.735	81.742
Note: Ce/Ce* = CeN/(0.5LaN + 0.5PrN), Eu/Eu* = EuN/(0.5SmN + 0.5GdN)

## Sheet: Suppl. Dataset Table 2
Supplementary Dataset Table 2. REY and P leached out in the steps of the P SEDEX.
Sample ID	Interval (cm)		REY in leachates (μg/g)						REY of bulk sed. (μg/g)	Relative percentage (%)					Recovery rate (%)		Leached P (μmol/g)							Relative percentage (%)					Total leached P (wt.%)	Sed. total P (wt.%)	Recovery rate (%)
	Top	Bottom	1. Loosely adsorbed P	2. Fe-bound P	3. Bioapatite & weakly crystallized apatite	4. Crystalline apatite	5. Organic-bound P	Sum		1. Loosely adsorbed P	2. Fe-bound P	3. Bioapatite & weakly crystallized apatite	4. Crystalline apatite	5. Organic-bound P			1. Loosely adsorbed P	2. Fe-bound P	3. Bioapatite & weakly crystallized apatite	4. Crystalline apatite	5. Organic-bound P	Reactive P	Sum	1. Loosely adsorbed P	2. Fe-bound P	3. Bioapatite & weakly crystallized apatite	4. Crystalline apatite	5. Organic-bound P
WP-01	0	10	1.04397	71.4226	415.818	67.14	32.5681	587.993	725.04	0.177549	12.1469	70.7182	11.4185	5.53886	81.098		1.07607	8.60853	76.0517	10.2548	3.90752	89.6438	99.8986	1.07716	8.61727	76.1289	10.2652	3.91148	0.309686	0.353662	87.5654
WP-05	40	50	0.400591	76.7365	409.928	44.8107	32.8362	564.712	656.07	0.0709373	13.5886	72.5906	7.93514	5.81469	86.075		1.07567	11.0838	65.9132	9.08538	3.59946	81.6721	90.7575	1.18522	12.2125	72.6256	10.0106	3.96602	0.281348	0.318732	88.271
WP-07	60	70	0.083631	20.487	531.927	80.0918	39.4737	672.063	787.09	0.0124439	3.04837	79.1484	11.9173	5.87352	85.3858		1.50261	2.01334	87.4389	14.4629	5.0723	96.0271	110.49	1.35995	1.8222	79.1373	13.0898	4.59073	0.342519	0.389	88.0512
WP-10	90	100	0.368079	70.8215	375.279	49.5818	27.4533	523.503	669.95	0.0703106	13.5284	71.686	9.47115	5.24414	78.1407		0.0578307	10.381	69.1711	8.852	3.30985	82.9198	91.7718	0.0630158	11.3118	75.373	9.64566	3.6066	0.284493	0.301268	94.4319
WP-15	140	150	0.410605	65.4533	472.797	51.9756	32.261	622.898	730.61	0.0659185	10.5079	75.9029	8.34416	5.17918	85.2572		0.743369	11.4029	80.0346	14.1099	3.71347	95.8943	110.004	0.675764	10.3659	72.756	12.8267	3.37575	0.341013	0.362394	94.1
WP-20	190	200	0.480441	75.3018	430.113	54.2233	25.4213	585.54	697.83	0.082051	12.8602	73.4558	9.26039	4.34152	83.9087		1.07396	12.2744	73.1623	13.6634	3.57541	90.0861	103.75	1.03514	11.8308	70.5182	13.1696	3.4462	0.321624	0.349296	92.0777
WP-21	200	210	0.159493	21.0214	519.592	83.5739	42.1829	666.53	785.31	0.0239289	3.15386	77.9548	12.5387	6.32874	84.8747		1.38105	2.03542	85.5665	15.9669	5.55312	94.5361	110.503	1.24978	1.84196	77.4337	14.4493	5.02531	0.342559	0.397	86.2869
WP-25	240	250	0.559314	83.4433	532.485	51.4398	22.5915	690.519	724.72	0.0809991	12.0841	77.1137	7.44944	3.27167	95.2808		1.26291	11.7955	75.2195	13.636	3.61957	91.8976	105.534	1.19669	11.1771	71.2755	12.921	3.42978	0.327154	0.366761	89.201
WP-30	290	300	0.970325	83.5288	535.14	59.8975	28.57	708.106	855.77	0.137031	11.7961	75.5734	8.45883	4.0347	82.7449		1.09159	13.1643	91.957	11.3961	3.87817	110.091	121.487	0.898525	10.836	75.6928	9.3805	3.19224	0.37661	0.432254	87.1272
WP-35	340	350	0.739902	78.818	543.487	61.2692	31.116	715.43	855.91	0.103421	11.0169	75.9665	8.56397	4.34927	83.587		0.911369	12.7548	88.2998	11.382	3.36817	105.334	116.716	0.780842	10.9281	75.6534	9.7519	2.88578	0.36182	0.427887	84.5597
WP-40	390	400	0.578541	93.215	505.643	56.0203	24.3932	679.85	819.95	0.0850983	13.7111	74.3757	8.2401	3.58803	82.9136		0.743507	12.8942	83.2844	10.5058	3.80009	100.722	111.228	0.668454	11.5926	74.8772	9.44529	3.41649	0.344806	0.397324	86.7822
WP-46	450	460	0.889968	93.1625	501.466	47.0421	25.0557	667.616	797.22	0.133305	13.9545	75.1129	7.04628	3.75302	83.743		0.748802	12.5202	78.0215	9.22058	3.75977	95.0503	104.271	0.718131	12.0074	74.8258	8.84291	3.60577	0.32324	0.392958	82.2581
WP-50	490	500	1.36236	101.329	593.866	50.9335	19.9476	767.439	869.25	0.17752	13.2036	77.3829	6.63681	2.59924	88.2875		1.25512	13.7037	92.3538	10.5568	3.70256	111.015	121.572	1.03241	11.2721	75.9664	8.68358	3.04557	0.376873	0.440986	85.4614
WP-53	520	530	0.218201	23.5054	616.184	82.4157	34.0554	756.378	860.9	0.0288482	3.10762	81.465	10.8961	4.50242	87.859		1.68305	2.15361	101.44	17.3786	5.89507	111.172	128.55	1.30925	1.6753	78.9107	13.5189	4.5858	0.398506	0.441	90.3642
WP-55	540	550	1.61027	91.196	592.282	56.7753	22.7009	764.565	881.55	0.210613	11.9278	77.4666	7.42584	2.96913	86.7296		-	13.7688	97.3936	10.4615	3.895	115.057	125.519	-	10.9695	77.5928	8.33463	3.10312	0.389109	0.467183	83.2883
WP-59	580	590	0.626304	25.2031	742.866	91.1463	35.1248	894.967	970.27	0.0699807	2.81609	83.0049	10.1843	3.9247	92.239		1.89803	2.77682	125.653	17.962	5.56226	135.89	153.852	1.23368	1.80486	81.6713	11.6748	3.61533	0.476941	0.506	94.2571
WP-60	590	600	1.05125	85.3746	630.32	58.8957	18.5767	794.218	905.86	0.132364	10.7495	79.3636	7.41556	2.33899	87.6756		1.0949	13.3876	102.083	10.038	3.88243	120.448	130.486	0.839095	10.2598	78.233	7.69275	2.97536	0.404507	0.475915	84.9956
WP-65	640	650	1.01509	89.3632	517.994	45.5784	18.7755	672.726	767.85	0.150893	13.2837	76.9992	6.77518	2.79097	87.6116		1.09611	13.0615	86.1237	9.38224	3.62828	103.91	113.292	0.967506	11.5291	76.0193	8.28148	3.2026	0.351205	0.392958	89.3747
WP-70	690	700	1.19688	93.6594	503.602	44.7925	21.3173	664.568	787.39	0.180099	14.0933	75.7788	6.7401	3.20769	84.4014		0.918798	11.22	80.0878	8.98341	3.79178	96.0184	105.002	0.875031	10.6855	76.2728	8.55549	3.61116	0.325505	0.379859	85.6911
WP-75	740	750	1.16933	95.1749	459.858	43.7506	25.0288	624.982	714.25	0.187098	15.2284	73.5794	7.00029	4.00473	87.5018		1.63893	12.5789	79.803	7.05148	3.87708	97.8979	104.949	1.56163	11.9857	76.0395	6.71893	3.69424	0.325343	0.353662	91.9927
WP-80	790	800	0.403431	100.043	441.407	33.8293	28.0839	603.767	695.82	0.0668189	16.5698	73.1089	5.60304	4.65144	86.7706		2.06602	14.3379	79.4949	6.04471	4.3641	100.263	106.308	1.94344	13.4872	74.7782	5.68605	4.10517	0.329554	0.336197	98.024
ESP-1-01	0	10	0.975673	40.0881	730.639	459.299	37.4086	1268.41	1341.19	0.0769209	3.1605	57.6027	36.2106	2.94925	94.5736		1.42782	10.9347	159.93	76.6983	23.4966	195.789	272.488	0.523994	4.0129	58.6927	28.1474	8.623	0.844712	0.799014	105.719
ESP-1-05	40	50	0.260627	51.1957	971.556	520.019	42.8472	1585.88	1661.86	0.0164342	3.22822	61.263	32.7906	2.7018	95.4279		1.93916	19.9786	198.409	77.9764	29.38	249.707	327.684	0.591777	6.09691	60.5491	23.7962	8.96597	1.01582	1.06972	94.9614
ESP-1-08	70	80	0.231185	47.3371	793.689	484.819	46.1913	1372.27	1349.96	0.016847	3.44955	57.8378	35.3298	3.36605	101.652		1.54999	6.22154	151.042	63.262	32.5799	191.394	254.656	0.608662	2.44312	59.3123	24.8422	12.7937	0.789432	0.947	83.3614
ESP-1-10	90	100	0.171664	42.7295	919.63	456.684	39.6551	1458.87	1487.69	0.0117669	2.92894	63.0372	31.3039	2.71821	98.0628		1.41838	21.4657	182.64	68.29	31.266	236.79	305.08	0.46492	7.03609	59.8663	22.3843	10.2485	0.945748	1.00423	94.1769
ESP-1-15	140	150	0.197407	47.9642	922.91	454.02	31.5842	1456.67	1572.61	0.0135519	3.29272	63.3573	31.1682	2.16824	92.6279		1.42399	20.0343	193.406	66.2743	29.0661	243.931	310.205	0.459047	6.45842	62.3479	21.3647	9.36996	0.961635	1.00423	95.7589
ESP-1-20	190	200	0.211793	42.312	927.994	495.033	37.94	1503.49	1658.08	0.0140867	2.81425	61.7226	32.9256	2.52346	90.6766		1.91529	18.9449	199.224	66.4577	29.5014	249.585	316.043	0.606024	5.99441	63.0369	21.0281	9.33463	0.979733	1.05225	93.1081
ESP-1-25	240	250	0.168277	181.002	825.758	380.881	25.3666	1413.18	1486.26	0.0119077	12.8082	58.4328	26.9522	1.79501	95.0827		2.79154	25.3524	211.145	59.4283	26.462	265.751	325.179	0.858464	7.79644	64.9319	18.2756	8.13768	1.00805	1.05225	95.7996
ESP-1-31	300	310	0.127571	133.107	842.757	239.516	18.6797	1234.19	1417.7	0.0103365	10.785	68.2844	19.4068	1.51352	87.0556		2.12427	25.838	199.506	35.9999	24.9	252.368	288.368	0.736651	8.96007	69.1845	12.484	8.63481	0.893941	0.947465	94.3509
ESP-1-35	340	350	0.142361	43.7785	905.703	421.742	35.3272	1406.69	1419.13	0.0101203	3.11216	64.3853	29.9811	2.51137	99.1236		0.912707	19.5311	211.524	58.9182	32.7514	264.72	323.638	0.282015	6.03486	65.3584	18.205	10.1198	1.00328	1.06972	93.7889
ESP-1-40	390	400	0.359808	41.6969	977.546	598.866	51.8542	1670.32	1645.35	0.0215412	2.49634	58.5244	35.8533	3.10444	101.518		0.748168	18.0783	258.195	71.2066	47.0981	324.119	395.326	0.189254	4.573	65.3119	18.0121	11.9137	1.22551	1.23563	99.1806
ESP-1-43	420	430	0.224919	54.9813	903.292	808.925	56.448	1823.87	1766.53	0.0123319	3.01454	49.5261	44.3521	3.09495	103.246		1.70035	6.6471	211.896	77.4176	44.2299	264.473	341.891	0.497338	1.94422	61.9777	22.6439	12.9368	1.05986	1.244	85.1979
ESP-1-44	430	440	0.396615	54.4166	1019.45	650.589	50.9729	1775.82	1639.5	0.0223341	3.0643	57.4071	36.6359	2.87038	108.315		1.86771	7.79803	207.705	71.6214	42.3977	259.769	331.39	0.563599	2.35313	62.677	21.6124	12.7939	1.02731	1.24	82.8475
ESP-1-45	440	450	0.303052	44.8083	942.64	749.634	45.735	1783.12	1719.06	0.0169956	2.51292	52.8646	42.0406	2.56489	103.727		0.91342	20.655	225.581	78.9616	48.2659	295.416	374.377	0.243984	5.51715	60.2551	21.0914	12.8923	1.16057	1.23563	93.925
ESP-1-50	490	500	0.234282	51.5053	1011.61	728.104	47.9056	1839.36	1841.27	0.0127372	2.80018	54.9979	39.5847	2.60447	99.8961		0.571837	19.9255	214.914	83.1165	52.252	287.663	370.78	0.154225	5.37395	57.9627	22.4167	14.0925	1.14942	1.2531	91.726
ESP-1-55	540	550	0.331635	43.9842	905.658	894.049	50.4058	1894.43	1851.3	0.0175058	2.32177	47.8064	47.1936	2.66074	102.33		-	20.5192	249.083	88.8302	53.6099	323.212	412.043	-	4.97987	60.4509	21.5585	13.0108	1.27733	1.44521	88.3838
ESP-1-60	590	600	0.212249	183.848	864.781	624.389	34.4692	1707.7	1698.62	0.0124289	10.7658	50.6401	36.5632	2.01846	100.535		1.77719	24.6775	223.886	78.8191	57.7995	308.14	386.959	0.459271	6.37728	57.8578	20.3688	14.9368	1.19957	1.35789	88.3412
ESP-1-65	640	650	0.126779	157.698	791.269	589.132	33.0569	1571.28	1604	0.00806851	10.0362	50.3582	37.4937	2.10381	97.9603		1.4207	23.6816	243.84	76.6463	51.0262	319.968	396.615	0.358208	5.97093	61.4803	19.3251	12.8654	1.22951	1.28803	95.4564
ESP-1-70	690	700	0.137497	179.716	844.029	480.426	34.6078	1538.92	1606.1	0.00893465	11.6781	54.8457	31.2185	2.24884	95.817		2.48375	24.0713	232.599	61.618	35.8701	295.025	356.643	0.696427	6.74942	65.2192	17.2772	10.0577	1.10559	1.2269	90.1125
ESP-1-75	740	750	0.161661	178.171	776.708	622.101	37.3379	1614.48	1617.44	0.0100132	11.0358	48.1089	38.5326	2.31269	99.817		1.86426	24.5474	230.54	64.3033	44.686	301.638	365.941	0.509443	6.70801	62.9993	17.572	12.2112	1.13442	1.20507	94.137
ESP-2-01	0	10	1.07661	6.52498	317.413	80.9594	2.81923	408.793	417.63	0.263363	1.59615	77.6464	19.8045	0.689647	97.8841		0.95823	2.30728	46.7908	19.377	6.13837	56.1947	75.5717	1.26798	3.05309	61.9158	25.6406	8.12257	0.234272	0.240141	97.5562
ESP-2-03	20	30	-	17.7241	918.563	582.87	31.7212	1550.88	1628.91	-	1.14284	59.2286	37.5832	2.04537	95.2096		0.710738	8.06916	180.703	78.9441	36.1697	225.652	304.596	0.233338	2.64913	59.3253	25.9176	11.8746	0.944248	1.01732	92.8169
ESP-2-06	50	60	0.502918	6.54848	665.201	624.615	34.5894	1331.46	1371.17	0.037772	0.491829	49.9604	46.9121	2.59786	97.1037		0.72294	8.62231	171.587	74.1375	34.5259	215.458	289.596	0.249637	2.97736	59.2506	25.6003	11.9221	0.897747	0.93	96.532
ESP-2-09	80	90	1.07275	80.0982	952.605	659.717	26.9457	1720.44	1752.49	0.062353	4.65569	55.3699	38.3459	1.56621	98.1711		1.77823	14.242	247.365	77.459	53.1206	316.506	393.965	0.451368	3.61503	62.7887	19.6614	13.4836	1.22129	1.27056	96.1221
ESP-2-12	110	120	0.335553	102.407	817.343	845.1	33.7427	1798.93	1800.91	0.0186529	5.69268	45.435	46.978	1.87571	99.89		1.97217	16.798	258.322	88.476	58.6959	335.788	424.264	0.464845	3.95934	60.887	20.854	13.8348	1.31522	1.42775	92.1184
ESP-2-15	140	150	14.6946	107.233	792.036	892.846	32.6057	1839.41	1869.99	0.798876	5.82971	43.0591	48.5397	1.77261	98.365		1.48275	12.8128	254.147	81.0924	61.582	330.025	411.117	0.360664	3.11657	61.8187	19.7249	14.9792	1.27446	1.45831	87.3931
ESP-2-18	170	180	0.369844	107.719	730.261	1134.13	41.2482	2013.73	1983.54	0.0183661	5.34921	36.2641	56.32	2.04835	101.522		1.21967	13.1536	265.961	93.4741	65.1646	345.499	438.973	0.277845	2.99645	60.5871	21.2938	14.8448	1.36082	1.64169	82.8912
ESP-2-21	200	210	0.344402	97.8855	594.9	1092.83	43.461	1829.42	1910.87	0.0188258	5.35063	32.5185	59.7363	2.37567	95.7375		1.25924	14.2874	269.147	102.813	70.5389	355.232	458.045	0.274916	3.11921	58.7598	22.4461	15.4	1.41994	1.72465	82.3322
ESP-2-24	230	240	10.1191	82.6431	606.343	853.55	37.3011	1589.96	1651.21	0.636437	5.19782	38.1358	53.6839	2.34605	96.2904		1.22666	12.0687	263.011	97.214	58.7034	335.009	432.223	0.283801	2.79223	60.8506	22.4916	13.5817	1.33989	1.55873	85.9604
ESP-2-27	260	270	-	41.8713	398.044	478.007	15.4656	933.387	930.56	-	4.48595	42.6451	51.2121	1.65693	100.304		1.56573	8.88082	177.201	67.6548	34.248	221.896	289.55	0.540744	3.06711	61.1987	23.3655	11.828	0.897606	0.864507	103.829
ESP-2-30	290	300	-	34.8559	426.052	451.733	19.9885	932.629	948.85	-	3.73737	45.6829	48.4365	2.14325	98.2905		0.0298915	6.60266	175.56	61.3047	36.6683	218.861	280.165	0.0106692	2.3567	62.6629	21.8816	13.0881	0.868513	0.868873	99.9585
ESP-2-33	320	330	-	36.8654	375.815	417.762	18.2855	848.728	910.67	-	4.3436	44.2798	49.2221	2.15446	93.1982		-	8.68954	152.945	62.6519	32.029	193.663	256.315	0	3.39017	59.6706	24.4433	12.4959	0.794578	0.833944	95.2795
ESP-2-36	350	360	-	33.115	420.573	420.833	12.9692	887.49	937.05	-	3.73131	47.389	47.4183	1.46134	94.711		0.71706	9.32191	154.152	58.1144	55.5022	219.693	277.808	0.258114	3.35553	55.4888	20.9189	19.9786	0.861204	0.833944	103.269
ESP-2-39	380	390	-	35.669	442.987	484.62	18.7809	982.057	937.76	-	3.63207	45.108	49.3475	1.9124	104.724		0.540826	2.06328	152.534	65.1715	70.0318	225.17	290.341	0.186273	0.71064	52.536	22.4465	24.1205	0.900058	0.903803	99.5857
ESP-2-42	410	420	-	26.9602	365.508	150.339	4.8401	547.647	549.25	-	4.92292	66.7415	27.4518	0.883799	99.7082		0.549524	2.95089	91.3758	31.193	48.2183	143.095	174.288	0.315297	1.69312	52.4282	17.8974	27.666	0.540291	0.537042	100.605
ESP-2-45	440	450	-	5.29569	57.5848	6.77239	-	69.6529	68.5	-	7.60297	82.674	9.72306	-	101.683		0.541053	1.70137	14.1062	3.15902	2.0542	18.4028	21.5618	2.50931	7.89068	65.422	14.651	9.52704	0.0668416	0.0611268	109.349

## Sheet: Suppl. Dataset Table 3
Supplementary Dataset Table 3. Nd isotope compositions of AA-CFA pellets.
Sediment ID	Depth	Grain ID	Description	143Nd/144Nd	2SE	145Nd/144Nd	2SE	147Sm/144Nd	2SE	εNd
ESP-1	570 cm	ESP-1-57-01	AA-CFA pellets	0.512392	3.36848e-05	0.348414	2.34738e-05	0.114399	0.000614005	-4.80651
	570 cm	ESP-1-57-02	AA-CFA pellets	0.512354	4.32999e-05	0.348425	2.35025e-05	0.119867	0.000878623	-5.54192
	570 cm	ESP-1-57-03	AA-CFA pellets	0.512496	5.58357e-05	0.348353	3.86605e-05	0.118537	0.00117738	-2.76608
	570 cm	ESP-1-57-04	AA-CFA pellets	0.51232	4.93573e-05	0.348354	3.32363e-05	0.117389	0.000978538	-6.20126
	570 cm	ESP-1-57-05	AA-CFA pellets	0.512352	3.12578e-05	0.348416	1.89681e-05	0.12074	0.00054855	-5.56923
	570 cm	ESP-1-57-06	AA-CFA pellets	0.512377	4.16486e-05	0.348398	2.84594e-05	0.12063	0.000629794	-5.08546
	570 cm	ESP-1-57-07	AA-CFA pellets	0.512385	3.54837e-05	0.348384	2.71863e-05	0.121436	0.000782784	-4.93136
	570 cm	ESP-1-57-08	AA-CFA pellets	0.512395	3.71502e-05	0.348404	2.26372e-05	0.122853	0.000591303	-4.74604
	570 cm	ESP-1-57-09	AA-CFA pellets	0.512365	4.23028e-05	0.348353	2.89492e-05	0.117931	0.000771271	-5.32735
	570 cm	ESP-1-57-10	AA-CFA pellets	0.512369	5.86539e-05	0.34838	3.55737e-05	0.120412	0.000936401	-5.24347
	570 cm	ESP-1-57-11	AA-CFA pellets	0.51231	5.00339e-05	0.348412	3.10818e-05	0.121937	0.000723371	-6.40023
	570 cm	ESP-1-57-12	AA-CFA pellets	0.512384	4.15386e-05	0.348431	2.06658e-05	0.125774	0.00063136	-4.95281
	570 cm	ESP-1-57-13	AA-CFA pellets	0.512326	4.41945e-05	0.348412	3.31451e-05	0.124553	0.000572316	-6.09202
									Average	-5.2049
ESP-2	190 cm	ESP-2-19-01	AA-CFA pellets	0.512369	5.71157e-05	0.348418	3.27293e-05	0.113104	0.00031652	-5.25517
	190 cm	ESP-2-19-02	AA-CFA pellets	0.512403	4.04489e-05	0.348409	2.76114e-05	0.116859	0.000367978	-4.58608
	190 cm	ESP-2-19-03	AA-CFA pellets	0.512394	5.33118e-05	0.348386	3.343e-05	0.115268	0.000366631	-4.74994
	190 cm	ESP-2-19-04	AA-CFA pellets	0.512375	4.96338e-05	0.348393	3.14445e-05	0.111033	0.000176206	-5.13423
	190 cm	ESP-2-19-05	AA-CFA pellets	0.512422	7.34937e-05	0.348366	4.65395e-05	0.113929	0.000201745	-4.21545
	190 cm	ESP-2-19-06	AA-CFA pellets	0.512366	2.75764e-05	0.348424	1.56411e-05	0.117088	0.000158086	-5.31369
	190 cm	ESP-2-19-07	AA-CFA pellets	0.512424	4.5064e-05	0.348365	2.41076e-05	0.114456	0.000174207	-4.17644
	190 cm	ESP-2-19-08	AA-CFA pellets	0.512398	6.2166e-05	0.348392	3.10035e-05	0.115376	0.000278124	-4.68947
	190 cm	ESP-2-19-09	AA-CFA pellets	0.512398	3.10628e-05	0.348425	1.63909e-05	0.118121	0.000152981	-4.67191
	190 cm	ESP-2-19-10	AA-CFA pellets	0.512326	4.16551e-05	0.348386	2.05508e-05	0.118269	0.000198981	-6.09397
	190 cm	ESP-2-19-11	AA-CFA pellets	0.512372	4.40831e-05	0.34841	2.49845e-05	0.115556	0.000181329	-5.1869
									Average	-4.91575
TKB-1	surface sed.	TKB-1-01	AA-CFA pellets	0.512387	2.24357e-05	0.348413	1.39584e-05	0.124915	0.000188979	-4.90014
	surface sed.	TKB-1-02	AA-CFA pellets	0.512374	1.45194e-05	0.348409	1.0942e-05	0.118489	0.000195159	-5.14593
	surface sed.	TKB-1-03	AA-CFA pellets	0.512353	2.67269e-05	0.348413	1.61521e-05	0.117839	0.00036843	-5.55558
	surface sed.	TKB-1-04	AA-CFA pellets	0.512383	2.49251e-05	0.348407	1.65485e-05	0.1194	0.000403089	-4.96647
	surface sed.	TKB-1-05	AA-CFA pellets	0.512325	2.51828e-05	0.348419	1.57468e-05	0.125075	0.000201159	-6.09982
	surface sed.	TKB-1-06	AA-CFA pellets	0.512355	2.01978e-05	0.348414	1.47284e-05	0.121629	0.00028859	-5.51851
	surface sed.	TKB-1-07	AA-CFA pellets	0.512373	2.567e-05	0.348423	1.52381e-05	0.117875	0.000542383	-5.16349
	surface sed.	TKB-1-08	AA-CFA pellets	0.512358	2.6665e-05	0.348413	1.4223e-05	0.119388	0.000364128	-5.45999
	surface sed.	TKB-1-09	AA-CFA pellets	0.512352	3.77826e-05	0.348407	1.89757e-05	0.122467	0.000367117	-5.57508
	surface sed.	TKB-1-10	AA-CFA pellets	0.512396	2.585e-05	0.348411	1.41745e-05	0.121954	0.000216823	-4.72458
	surface sed.	TKB-1-11	AA-CFA pellets	0.512377	2.65545e-05	0.348416	1.72075e-05	0.121707	0.000495373	-5.09911
	surface sed.	TKB-1-12	AA-CFA pellets	0.512365	3.57356e-05	0.348447	2.27987e-05	0.134307	0.000372696	-5.33515
	surface sed.	TKB-1-13	AA-CFA pellets	0.512392	3.32571e-05	0.348396	2.28573e-05	0.129259	0.000440515	-4.79091
	surface sed.	TKB-1-14	AA-CFA pellets	0.512374	2.86826e-05	0.348399	1.92567e-05	0.122155	0.000454087	-5.15959
	surface sed.	TKB-1-15	AA-CFA pellets	0.512324	3.17696e-05	0.348377	2.6697e-05	0.125062	0.00057742	-6.11933
	surface sed.	TKB-1-16	AA-CFA pellets	0.512371	3.12351e-05	0.34841	1.76778e-05	0.124899	0.00038124	-5.2064
	surface sed.	TKB-1-17	AA-CFA pellets	0.512354	3.31941e-05	0.348428	1.76581e-05	0.131123	0.00032952	-5.54973
	surface sed.	TKB-1-18	AA-CFA pellets	0.51233	2.88138e-05	0.348397	1.89255e-05	0.121354	0.000343543	-6.00424
	surface sed.	TKB-1-19	AA-CFA pellets	0.512427	3.80174e-05	0.348424	2.17478e-05	0.122231	0.000330365	-4.11011
	surface sed.	TKB-1-20	AA-CFA pellets	0.512387	3.37452e-05	0.348419	2.76526e-05	0.122419	0.000317158	-4.89234
	surface sed.	TKB-1-21	AA-CFA pellets	0.512348	3.56453e-05	0.348414	2.14375e-05	0.122937	0.000408959	-5.64726
	surface sed.	TKB-1-22	AA-CFA pellets	0.512364	3.03872e-05	0.348393	2.25765e-05	0.122258	0.00037677	-5.34685
	surface sed.	TKB-1-23	AA-CFA pellets	0.512345	2.3867e-05	0.348422	1.2685e-05	0.123583	0.000222452	-5.71748
	surface sed.	TKB-1-24	AA-CFA pellets	0.512387	2.47914e-05	0.348412	1.75361e-05	0.116422	0.000756651	-4.90405
	surface sed.	TKB-1-25	AA-CFA pellets	0.51235	2.33139e-05	0.348434	1.3619e-05	0.124312	0.000364925	-5.6219
	surface sed.	TKB-1-26	AA-CFA pellets	0.512357	1.97072e-05	0.348412	9.94791e-06	0.121343	0.00028273	-5.4834
	surface sed.	TKB-1-27	AA-CFA pellets	0.512387	3.22714e-05	0.348405	2.36212e-05	0.119672	0.000258148	-4.89234
	surface sed.	TKB-1-28	AA-CFA pellets	0.512387	3.62122e-05	0.348412	2.1043e-05	0.123036	0.000272546	-4.90405
	surface sed.	TKB-1-29	AA-CFA pellets	0.512377	1.93841e-05	0.348397	1.55652e-05	0.120381	0.000580935	-5.09716
	surface sed.	TKB-1-30	AA-CFA pellets	0.51236	2.96019e-05	0.348425	1.6699e-05	0.120333	0.00033535	-5.43073
									Average	-5.28072
TKB-3	surface sed.	TKB-3-01	AA-CFA pellets	0.512376	1.65899e-05	0.348401	1.5406e-05	0.121461	0.000355937	-5.11082
	surface sed.	TKB-3-02	AA-CFA pellets	0.51238	2.05039e-05	0.348425	1.5663e-05	0.121853	0.000344237	-5.02694
	surface sed.	TKB-3-03	AA-CFA pellets	0.512359	2.42986e-05	0.348425	1.6358e-05	0.123416	0.000524644	-5.45219
	surface sed.	TKB-3-04	AA-CFA pellets	0.512352	1.91818e-05	0.348422	1.31175e-05	0.119834	0.000335625	-5.56923
	surface sed.	TKB-3-05	AA-CFA pellets	0.51232	3.19238e-05	0.34838	2.60729e-05	0.118245	0.00051059	-6.1954
	surface sed.	TKB-3-06	AA-CFA pellets	0.512365	2.07692e-05	0.348407	1.49562e-05	0.118727	0.000279259	-5.32344
	surface sed.	TKB-3-07	AA-CFA pellets	0.512389	3.01792e-05	0.348438	2.21331e-05	0.120866	0.00051796	-4.86113
	surface sed.	TKB-3-08	AA-CFA pellets	0.512368	2.32577e-05	0.348446	1.24101e-05	0.117703	0.000300847	-5.26492
	surface sed.	TKB-3-09	AA-CFA pellets	0.51236	2.32846e-05	0.348419	1.35134e-05	0.115963	0.000170315	-5.41708
	surface sed.	TKB-3-10	AA-CFA pellets	0.512377	1.80129e-05	0.348428	1.21292e-05	0.119979	0.000192966	-5.09521
	surface sed.	TKB-3-11	AA-CFA pellets	0.512332	2.37263e-05	0.348421	1.3816e-05	0.118644	0.000337354	-5.96717
	surface sed.	TKB-3-12	AA-CFA pellets	0.51236	2.74163e-05	0.348442	1.63709e-05	0.119464	0.000394754	-5.42683
	surface sed.	TKB-3-13	AA-CFA pellets	0.512341	1.73967e-05	0.348436	1.28976e-05	0.11878	0.000278296	-5.79356
	surface sed.	TKB-3-14	AA-CFA pellets	0.512327	2.14323e-05	0.348423	1.11827e-05	0.122387	0.000240307	-6.06081
	surface sed.	TKB-3-15	AA-CFA pellets	0.512378	2.65991e-05	0.348447	1.67993e-05	0.121236	0.000375762	-5.06205
	surface sed.	TKB-3-16	AA-CFA pellets	0.512407	1.71775e-05	0.348403	1.36748e-05	0.119031	0.000424544	-4.50805
	surface sed.	TKB-3-17	AA-CFA pellets	0.512349	2.11431e-05	0.348428	1.37487e-05	0.117857	0.000314509	-5.6297
	surface sed.	TKB-3-18	AA-CFA pellets	0.512357	3.32922e-05	0.348419	2.29075e-05	0.118835	0.000547159	-5.48535
	surface sed.	TKB-3-19	AA-CFA pellets	0.512379	2.42806e-05	0.348432	1.99214e-05	0.121197	0.000217981	-5.05035
	surface sed.	TKB-3-20	AA-CFA pellets	0.512371	2.08477e-05	0.348424	1.14066e-05	0.11709	0.000362914	-5.2064
	surface sed.	TKB-3-21	AA-CFA pellets	0.512393	2.7028e-05	0.348424	1.6604e-05	0.119612	0.00027992	-4.77725
	surface sed.	TKB-3-22	AA-CFA pellets	0.51235	1.82714e-05	0.348428	1.19577e-05	0.121135	0.000298786	-5.6258
	surface sed.	TKB-3-23	AA-CFA pellets	0.512395	3.09611e-05	0.348419	1.32464e-05	0.118987	0.000447482	-4.73629
	surface sed.	TKB-3-24	AA-CFA pellets	0.512362	2.26419e-05	0.348397	2.18521e-05	0.121738	0.000373261	-5.38197
	surface sed.	TKB-3-25	AA-CFA pellets	0.51239	2.27941e-05	0.348426	1.79806e-05	0.121911	0.000252125	-4.84162
	surface sed.	TKB-3-26	AA-CFA pellets	0.512396	2.87264e-05	0.348419	2.41215e-05	0.119336	0.000394149	-4.73043
	surface sed.	TKB-3-27	AA-CFA pellets	0.512401	3.54581e-05	0.348416	2.32477e-05	0.122115	0.000733932	-4.61339
	surface sed.	TKB-3-28	AA-CFA pellets	0.512421	3.68911e-05	0.348418	2.23322e-05	0.119634	0.000365805	-4.22715
	surface sed.	TKB-3-29	AA-CFA pellets	0.51237	2.23271e-05	0.34842	1.49065e-05	0.116102	0.000394954	-5.22786
	surface sed.	TKB-3-30	AA-CFA pellets	0.512321	2.62884e-05	0.348421	1.59198e-05	0.118524	0.0004418	-6.1759
									Average	-5.26148
Durango	-	-	Reference	0.51247	3.00553e-05	0.348424	1.94093e-05	0.0784929	0.000121858	-3.27717
Durango	-	-	Reference	0.512476	3.27569e-05	0.348415	1.84918e-05	0.0780443	0.000103244	-3.15622
Durango	-	-	Reference	0.512475	3.27681e-05	0.348432	1.66645e-05	0.0785196	0.000111803	-3.17183
Durango	-	-	Reference	0.512467	2.91519e-05	0.348414	1.75704e-05	0.0785	0.000119925	-3.33764
Durango	-	-	Reference	0.512488	2.41551e-05	0.348442	1.73895e-05	0.0783545	9.42538e-05	-2.92019
Durango	-	-	Reference	0.51247	2.41902e-05	0.348407	1.43698e-05	0.0784441	0.000111115	-3.27912
Durango	-	-	Reference	0.512486	2.3026e-05	0.348428	1.61379e-05	0.0785086	9.44141e-05	-2.9553
Durango	-	-	Reference	0.512467	2.64346e-05	0.348404	1.8465e-05	0.0787934	7.65489e-05	-3.34154
MAD	-	-	Reference	0.511364	3.33745e-05	0.348423	1.67284e-05	0.0814675	0.000168876	-24.8577
MAD	-	-	Reference	0.511345	2.73576e-05	0.348406	1.64617e-05	0.0817301	0.000158554	-25.2283
MAD	-	-	Reference	0.511355	2.77196e-05	0.348423	1.60275e-05	0.0818021	0.000168514	-25.0333
MAD	-	-	Reference	0.511326	3.15006e-05	0.348422	2.00708e-05	0.0822292	0.000155027	-25.599
MAD	-	-	Reference	0.511363	2.98689e-05	0.348402	2.12691e-05	0.0817418	0.000147827	-24.8675
MAD	-	-	Reference	0.511353	2.88959e-05	0.348432	1.78307e-05	0.0820834	0.000131331	-25.0606
MAD	-	-	Reference	0.511341	2.97327e-05	0.348413	1.73771e-05	0.0820685	0.000163537	-25.3005
MAD	-	-	Reference	0.51134	2.90606e-05	0.348403	1.91023e-05	0.0819238	0.000170936	-25.3259
MAD	-	-	Reference	0.511336	2.59143e-05	0.34842	1.89898e-05	0.0818548	0.000154671	-25.3902
MAD	-	-	Reference	0.511347	3.00382e-05	0.348396	1.74296e-05	0.0818287	0.000174344	-25.1796
MAD	-	-	Reference	0.511364	2.95179e-05	0.348422	1.81244e-05	0.0816194	0.000167802	-24.844
MAD	-	-	Reference	0.511362	2.98144e-05	0.348421	1.7906e-05	0.0818426	0.000162396	-24.8889
MAD	-	-	Reference	0.511324	2.96616e-05	0.348411	1.78258e-05	0.0821222	0.000144359	-25.6243
MAD	-	-	Reference	0.511356	2.85147e-05	0.348421	1.91323e-05	0.081279	0.000175072	-25.0118
MAD	-	-	Reference	0.511353	3.07377e-05	0.348404	1.83168e-05	0.0819649	0.000143504	-25.0664
MAD	-	-	Reference	0.511359	2.77768e-05	0.348425	1.66696e-05	0.0818388	0.000167097	-24.9552
MAD	-	-	Reference	0.511348	2.34617e-05	0.348414	1.35011e-05	0.0818439	9.80658e-05	-25.1718
MAD	-	-	Reference	0.511357	2.50548e-05	0.348418	1.38368e-05	0.0818916	8.95822e-05	-24.9942
MAD	-	-	Reference	0.511352	2.24294e-05	0.348411	1.47291e-05	0.0817361	9.61198e-05	-25.084
MAD	-	-	Reference	0.511337	2.37372e-05	0.348413	1.43461e-05	0.0816918	9.91309e-05	-25.3727
MAD	-	-	Reference	0.511354	2.63577e-05	0.348412	1.47395e-05	0.0818067	0.000100651	-25.043
MAD	-	-	Reference	0.511363	2.74172e-05	0.34843	1.75795e-05	0.0818504	0.000128258	-24.8694
MAD	-	-	Reference	0.511347	2.54873e-05	0.348407	1.46902e-05	0.0817603	0.000116543	-25.1815
MAD	-	-	Reference	0.511328	2.60355e-05	0.348411	1.52621e-05	0.0817826	5.81166e-05	-25.5599
Note: Chondritic Uniform Reservoir (CHUR)
